# Supplementary material
Source: publisher figshare collection journal article supplement (https://springernature.figshare.com/ndownloader/files/21726687)
Supplement: Supplementary file [file 21726687]

## iSeqQC workflow

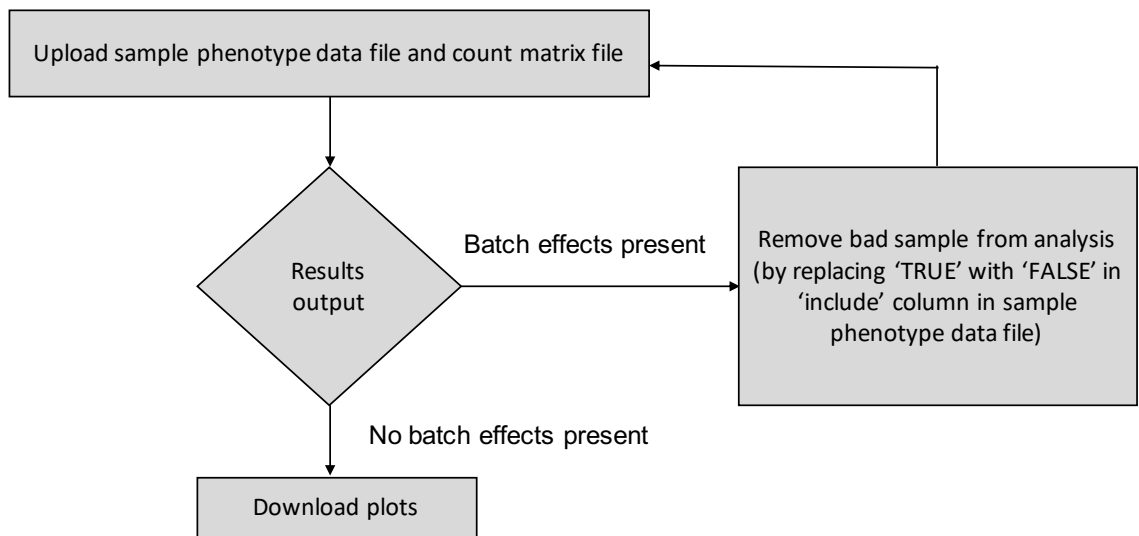

Fig. 2
